# Supplementary material
Source: PubMed Central journal article supplement (PMC10473391)
Supplement: LSHSS-54-996-s001.pdf [file LSHSS-54-996-s001.pdf]

**Supplemental Material S1.** Participant characteristics by site.

| <b>Characteristic</b>                      | <b>New York (n = 36)</b>      | <b>Texas (n = 30)</b>        | <b>p<sup>a</sup></b> |
|--------------------------------------------|-------------------------------|------------------------------|----------------------|
| DLD                                        | 14                            | 19                           | .083                 |
| Gender                                     | 15 girls,<br>21 boys          | 12 girls,<br>18 boys         | > .99                |
| Age (months)                               | 62.00 (10.21)<br>Range: 49-83 | 60.43 (8.74)<br>Range: 48-83 | .510                 |
| Maternal Education Level:                  |                               |                              | < .001***            |
| Elementary                                 | 19                            | 1                            |                      |
| High School                                | 8                             | 10                           |                      |
| Some College                               | 1                             | 3                            |                      |
| Associate's Degree                         | 3                             | 3                            |                      |
| Bachelor's Degree                          | 3                             | 4                            |                      |
| Graduate Degree                            | 0                             | 7                            |                      |
| Not reported                               | (2)                           | (2)                          |                      |
| Free/reduced lunch                         | 32/32 reported                | 18/29 reported               | < .001***            |
| Country of Origin                          |                               |                              | < .001***            |
| Mexico                                     | 15                            | 15                           |                      |
| Puerto Rico                                | 15                            | 0                            |                      |
| (mainland) United States                   | 2                             | 0                            |                      |
| Other                                      | 1                             | 13                           |                      |
| Not reported                               | (3)                           | (2)                          |                      |
| Parent's Best Language                     |                               |                              | .251                 |
| Spanish                                    | 24                            | 19                           |                      |
| English                                    | 1                             | 2                            |                      |
| Both                                       | 1                             | 5                            |                      |
| Not reported                               | (10)                          | (4)                          |                      |
| Child's Age of English Acquisition (years) | 3.18 (1.70)<br>Range: 1-6     | 2.52 (1.12)<br>Range: 1-4    | .107                 |
| Language w/ Child (mother)                 |                               |                              | .116                 |
| Only English                               | 0                             | 0                            |                      |
| Mainly English                             | 0                             | 1                            |                      |
| Spanish and English                        | 5                             | 3                            |                      |
| Mainly Spanish                             | 8                             | 14                           |                      |
| Only Spanish                               | 20                            | 11                           |                      |
| Not reported                               | (3)                           | (1)                          |                      |
| Language w/ Child (father)                 |                               |                              | .046*                |
| Only English                               | 0                             | 0                            |                      |
| Mainly English                             | 0                             | 0                            |                      |
| Spanish and English                        | 8                             | 6                            |                      |
| Mainly Spanish                             | 4                             | 12                           |                      |
| Only Spanish                               | 19                            | 11                           |                      |

| Other<br>Not reported                                   | 1<br>(4)                        | 0<br>(1)                        |           |
|---------------------------------------------------------|---------------------------------|---------------------------------|-----------|
| School Language<br>Bilingual<br>English<br>Not reported | 12<br>23<br>(1)                 | 7<br>20<br>(3)                  | .579      |
| Current<br>Speech/Language<br>Therapy (parent report)   | 3/30 reported                   | 18/30 reported                  | < .001*** |
| Nonverbal Intelligence<br>(KBIT)                        | 97.14 (11.00)<br>Range: 74-121  | 102.10 (17.01)<br>Range: 73-139 | .175      |
| BESA Spanish Morph                                      | 86.75 (14.61)<br>Range: 60-113  | 81.43 (18.96)<br>Range: 52-118  | .215      |
| BESA English Morph                                      | 71.78 (14.60)<br>Range: 52-108  | 76.73 (22.77)<br>Range: 52-115  | .309      |
| BESA Best Score                                         | 88.03 (13.42)<br>Range: 60-113  | 84.50 (20.25)<br>Range: 52-118  | .418      |
| BESA Difference Score<br>(En Morph – Sp Morph)          | -14.97 (17.66)<br>Range: -51-13 | -4.70 (14.96)<br>Range: -48-18  | .014*     |

\* $p < .05$ . \*\*\* $p < .001$ .

<sup>a</sup> $p$ -values reflect independent samples  $t$ -tests for continuous variables and tests of independence for categorical variables (using Fisher's exact test for  $2 \times 2$  contingency tables and Monte-Carlo simulation with 10,000 replicates to calculate  $p$ -values when there were more than 2 categories, given that expected counts were often  $< 5$ ).
