# Supplementary material
Source: PubMed Central journal article supplement (PMC10473391)
Supplement: LSHSS-54-996-s002.pdf [file LSHSS-54-996-s002.pdf]

## Supplemental Material S2. Spearman-rho correlation tables.

### Spanish Samples

| Variable             | <i>M</i> | <i>SD</i> | 1            | 2            | 3            | 4            | 5           | 6     |
|----------------------|----------|-----------|--------------|--------------|--------------|--------------|-------------|-------|
| 1. InterCSProp       | 0.02     | 0.08      |              |              |              |              |             |       |
| 2. IntraCSProp       | 0.07     | 0.14      | <b>0.57</b>  |              |              |              |             |       |
| 3. Age (mo)          | 61.29    | 9.53      | <b>-0.36</b> | <b>-0.33</b> |              |              |             |       |
| 4. BESA Sp           | 84.33    | 16.81     | <b>-0.35</b> | <b>-0.39</b> | <b>0.41</b>  |              |             |       |
| 5. BESA En           | 74.03    | 18.77     | -0.08        | -0.02        | -0.01        | <b>0.45</b>  |             |       |
| 6. BESA Best         | 86.42    | 16.82     | <b>-0.35</b> | <b>-0.38</b> | <b>0.39</b>  | <b>0.97</b>  | <b>0.57</b> |       |
| 7. BESA Diff (En-Sp) | -10.30   | 17.16     | <b>0.24</b>  | 0.22         | <b>-0.27</b> | <b>-0.32</b> | <b>0.59</b> | -0.14 |

*Note.* Bolded values show significant correlations,  $p < .05$ ; includes 33 children with DLD and 33 children with TLD.

### English Samples

| Variable             | <i>M</i> | <i>SD</i> | 1            | 2            | 3           | 4            | 5           | 6     |
|----------------------|----------|-----------|--------------|--------------|-------------|--------------|-------------|-------|
| 1. InterCSProp       | 0.05     | 0.12      |              |              |             |              |             |       |
| 2. IntraCSProp       | 0.07     | 0.17      | <b>0.43</b>  |              |             |              |             |       |
| 3. Age (mo)          | 61.18    | 9.92      | -0.12        | -0.01        |             |              |             |       |
| 4. BESA Sp           | 83.67    | 16.86     | -0.16        | -0.02        | <b>0.37</b> |              |             |       |
| 5. BESA En           | 75.72    | 18.51     | <b>-0.40</b> | <b>-0.36</b> | 0.06        | <b>0.59</b>  |             |       |
| 6. BESA Best         | 85.97    | 16.96     | -0.23        | -0.07        | <b>0.36</b> | <b>0.97</b>  | <b>0.71</b> |       |
| 7. BESA Diff (En-Sp) | -7.95    | 14.78     | -0.24        | <b>-0.33</b> | -0.22       | <b>-0.27</b> | <b>0.52</b> | -0.09 |

*Note.* Bolded values show significant correlations,  $p < .05$ ; includes 31 children with DLD and 29 children with TLD.
