# Supplementary material
Source: PubMed Central journal article supplement (PMC10473391)
Supplement: LSHSS-54-996-s003.pdf [file LSHSS-54-996-s003.pdf]

### Supplemental Material S3. Examples of insertion types.

#### Spanish Samples

| Type                          | Example                                                                               |
|-------------------------------|---------------------------------------------------------------------------------------|
| Noun                          | El <b>boat</b> estaba allí.                                                           |
| Noun phrase                   | Éste es para ca <b>this yup</b> pa agua.                                              |
| Pronoun                       | Y <b>this</b> .                                                                       |
| Conjunction.                  | <b>And</b> nada más.<br>Chica <b>and</b> Juan.                                        |
| Determiner                    | <b>The</b> rana estaba adentro de comida.                                             |
| Verb                          | Una rana <b>kiss</b> con esto                                                         |
| Progressive Verb              | Está <b>hiding</b> .                                                                  |
| Adjective                     | Y no está <b>happy</b> .                                                              |
| Adverb                        | <b>Then</b> estaba riendo.                                                            |
| Other                         | Acá adentro hay que está todo a perro <b>brock</b> .<br><i>[English-like nonword]</i> |
| Noun Reverse Insertion        | It's full of <b>agua</b> .                                                            |
| Pronoun Reverse Insertion     | And <b>él</b> drive.                                                                  |
| Conjunction Reverse Insertion | <b>Y</b> got it the frog.                                                             |
| Determiner Reverse Insertion  | It's <b>una</b> flowers.                                                              |
| Verb Reverse Insertion        | The frog <b>comprejo</b> . <i>[Spanish verb-like nonword]</i>                         |
| Adjective Reverse Insertion   | <b>Allá</b> big frog.                                                                 |

#### English Samples

| Type                               | Example                                                                  |
|------------------------------------|--------------------------------------------------------------------------|
| Noun                               | And he didn't know that the <b>niño</b> was getting the <b>perrito</b> . |
| Pronoun                            | <b>Él</b> laughing.                                                      |
| Conjunction.                       | <b>Y</b> the boy <b>y</b> the dog keep going.                            |
| Determiner                         | <b>La</b> frog sad.<br>This is <b>su</b> frog.                           |
| Verb                               | <b>Es</b> a frog.                                                        |
| Noun Reverse Insertion             | Y después el <b>frog</b> estaba en un <b>rock</b> .                      |
| Pronoun Reverse Insertion          | Y es <b>it</b> .                                                         |
| Preposition Reverse Insertion      | <b>In</b> ahí está o rano.                                               |
| Verb Stem Reverse Insertion        | Y la perra está <b>jumpando</b> su hijo.                                 |
| Progressive Verb Reverse Insertion | Y él <b>crying</b> .                                                     |
| Adjective Reverse Insertion        | Y un rana sí <b>sad</b> .                                                |
